# Supplementary material for: Bumetanide Oral Liquid Formulation for the Treatment of Children and Adolescents with Autism Spectrum Disorder: Design of Two Phase III Studies (SIGN Trials)
Source: PubMed Central journal article supplement (PMC8254707; doi:10.1007/s10803-020-04709-8), 2020-11-05
Supplement: 10803_2020_4709_MOESM2_ESM.pdf [file 10803_2020_4709_MOESM2_ESM.pdf]

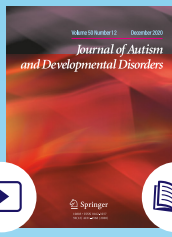

# Bumetanide Oral Liquid Formulation for the Treatment of Children and Adolescents with Autism Spectrum Disorder: Design of Two Phase III Studies (SIGN Trials)

Véronique Crutel, Estelle Lambert, Pierre-François Penelaud, Cristina Albarrán Severo, Joaquin Fuentes, Antoine Rosier, Amaia Hervás, Stéphane Marret, Guiomar Oliveira, Mara Parellada, Simon Kyaga, Sylvie Gouttefangeas, Marianne Bertrand, Denis Ravel, Bruno Falissard. *Journal of Autism and Developmental Disorders* <https://doi.org/10.1007/s10803-020-04709-8>

Click the links to watch the video and find out more.

## Autism spectrum disorder (ASD)

A neurodevelopmental condition with early **deficits in communication and social interaction**, and the presence of **restrictive, repetitive behaviors**.

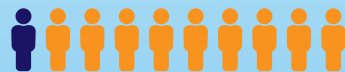

~1% of the population

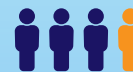

3:1 male to female ratio

**No approved medication for these symptoms**

## Bumetanide

In ASD, bumetanide is hypothesized to act by inhibiting the **NKCC1 cotransporter** in the brain and promoting inhibitory GABA signaling through normalization of intracellular chloride levels.

An **oral solution** of bumetanide is being assessed as a potential treatment for children and adolescents with ASD with a dedicated formulation.

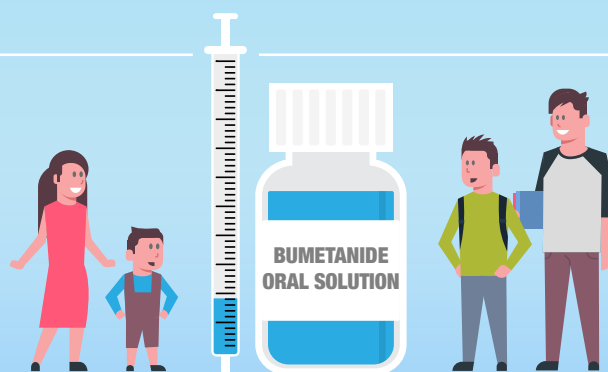

## The SIGN trials

**13** countries

**2** trials

**400** total patients

**200** autistic children aged 2-6 years

**200** autistic children and adolescents aged 7-17 years

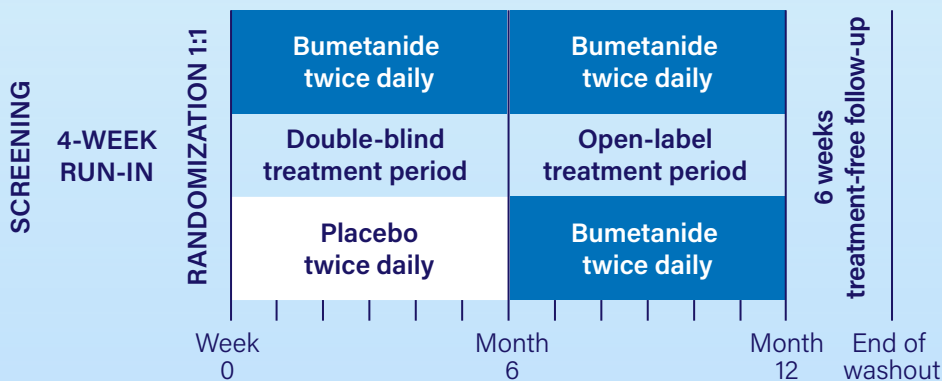

Patients <25 kg: oral solution of bumetanide 0.02 mg/kg twice daily, or placebo  
Patients ≥25 kg: oral solution of bumetanide 0.5 mg twice daily, or placebo

Primary endpoint

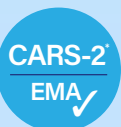

Secondary Endpoints

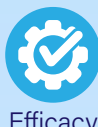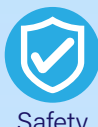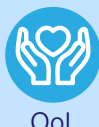

## Conclusion

Positive results would herald bumetanide oral solution as the first and only pharmacological treatment to **enhance social reciprocity and limit repetitive behavior**, thereby helping patients and families living with ASD to improve their **social integration and quality of life**.
